# Supplementary material for: Monitoring patients with celiac disease on gluten free diet: different outcomes comparing three tissue transglutaminase IgA assays
Source: publisher site journal article supplement (doi:10.1515/cclm-2023-1076), 2023-11-09
Supplement: Supplementary file 1 [file j_cclm-2023-1076_suppl_001.docx]

**Supplementary Figure 1:**

Samples included in the study. Retrospective selection was done in three centers, two using tTG-IgA FEIA and one using tTG-IgA CLIA. In the boxes the number of samples from either adults or children is indicated. Between brackets is the range of days since diagnosis. Some samples had normalized during follow-up 1, from these patients no follow-up sample 2 was available.

**Supplementary Figure 2:**

Shown are tTG-IgA levels as multitude of cut-off (xCO) measured by CLIA or CHLIA of all second follow-up samples with a normalized tTG-IgA according to FEIA.

**Supplementary Figure 3:** . Kaplan-Meier plot of time to normalization of the tTG-IgA. On the X-axis days since diagnosis and on the Y axis the fraction of the cohort that has no normalized tTG-IgA yet, stratified by assay. For FEIA the cutoff 3.2 U/mL is used, for CLIA and C(h)LIA the original cutoffs. (FEIA in blue, CLIA in magenta and ChLIA in green)
